# Supplementary material for: Improved Surface Display of Human Hyal1 and Identification of Testosterone Propionate and Chicoric Acid as New Inhibitors
Source: PubMed Central journal article supplement (PMC7243119; doi:10.3390/ph13040054), 2020-03-26
Supplement: pharmaceuticals-13-00054-s001.pdf [file pharmaceuticals-13-00054-s001.pdf]

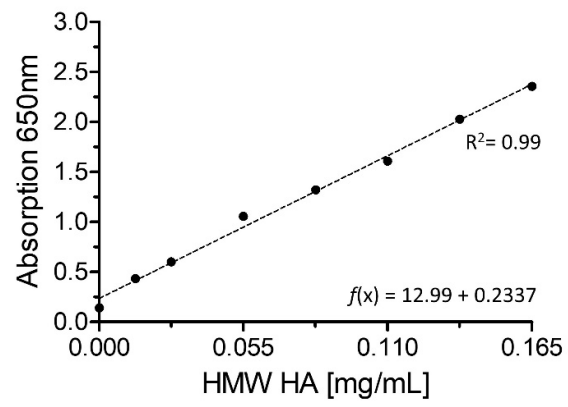

**Figure S 1:** Calibration curve – Stains-all method. Absorption depending on HMW HA [mg/mL].

**Table S 1:** Structure and inhibition values of testosterone derivatives

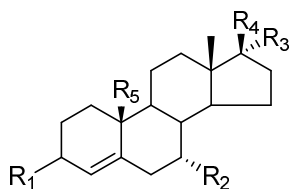

|                   | R <sub>1</sub> | R <sub>2</sub> | R <sub>3</sub> | R <sub>4</sub> | R <sub>5</sub> | inhibition [%] 200 μM |
|-------------------|----------------|----------------|----------------|----------------|----------------|-----------------------|
| YC338             |                |                |                |                |                | 8                     |
| MR241             |                |                |                |                |                | 0                     |
| MR234             |                |                |                |                |                | 0                     |
| YC208             |                |                |                |                |                | 22                    |
| EM383             |                |                |                |                |                | 6                     |
| MR123             |                |                |                |                |                | 22                    |
| 3CMO-Testo        |                |                |                |                |                | 28                    |
| EM892             |                |                |                |                |                | 20                    |
| EM814             |                |                |                |                |                | 17                    |
| Testo-3CMOesterMe |                |                |                |                |                | 17                    |
| YC141             |                |                |                |                |                | 0                     |
| MR497             |                |                |                |                |                | 0                     |
| MR405             |                |                |                |                |                | 13                    |

**Table S 2:** Structure and inhibition values of dihydrotestosterone derivatives

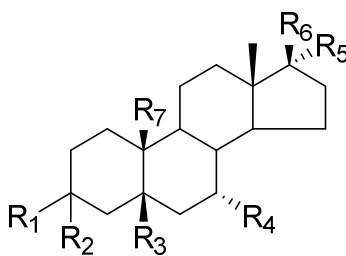

|          | R <sub>1</sub> | R <sub>2</sub> | R <sub>3</sub> | R <sub>4</sub> | R <sub>5</sub> | R <sub>6</sub> | R <sub>7</sub> | Inhibition<br>[%]<br>200 μM |
|----------|----------------|----------------|----------------|----------------|----------------|----------------|----------------|-----------------------------|
| 3CMO-DHT |                | -              |                |                |                |                |                | 31                          |
| EM817    |                |                |                |                |                |                |                | 3                           |
| MR22     |                | -              |                |                |                |                |                | 0                           |
| MR568    |                | -              |                |                |                |                |                | 0                           |
| MR572    |                | -              |                |                |                |                |                | 5                           |
| MR574    |                | -              |                |                |                |                |                | 18                          |

Table S 3: Structure and inhibition values of cinnamic acid derivatives

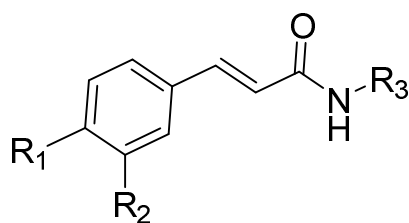

|                    | R <sub>1</sub> | R <sub>2</sub> | R <sub>3</sub> | inhibition [%]<br>200 μM |
|--------------------|----------------|----------------|----------------|--------------------------|
| SB12 + LR78        |                |                |                | 30                       |
| SB14               |                |                |                | 25                       |
| SB15               |                |                |                | 26                       |
| SB16 + SB22        |                |                |                | 27                       |
| SB25               |                |                |                | 37                       |
| SB18               |                |                |                | 19                       |
| SB21               |                |                |                | 33                       |
| SB19 + SB20 + SB23 |                |                |                | 18                       |
| SB26               |                |                |                | 20                       |
| SB27               |                |                |                | 4                        |
| LR76               |                |                |                | 11                       |
| LR 77              |                |                |                | 0                        |
| LR80               |                |                |                | 0                        |
| SB9                |                |                |                | 0                        |
